# Supplementary material for: Promotion of Intestinal Epithelial Cell Turnover by Commensal Bacteria: Role of Short-Chain Fatty Acids
Source: PubMed Central journal article supplement (PMC4883796; doi:10.1371/journal.pone.0156334), 2016-05-27
Supplement: pone.0156334.s003.pdf [file pone.0156334.s003.pdf]

Supporting Information S1 Table1

Park et al.

**S1 Table 1. Amounts of acetate, propionate, and butyrate in cecal contents of SPF mice treated with an antibiotic cocktail (Abx: ampicillin, vancomycin, metronidazole, neomycin) in drinking water for 4 weeks.**

| SCFA (nmol/mg cecal contents) | Water | Abx  |
|-------------------------------|-------|------|
| Acetate                       | 31.87 | 3.72 |
| Propionate                    | 7.02  | ND   |
| Butyrate                      | 13.45 | ND   |

ND, not detected
